# Supplementary material for: Orthotopic Bone Formation by Streamlined Engineering and Devitalization of Human Hypertrophic Cartilage
Source: PubMed Central journal article supplement (PMC7582540; doi:10.3390/ijms21197233), 2020-09-30
Supplement: ijms-21-07233-s001.pdf [file ijms-21-07233-s001.pdf]

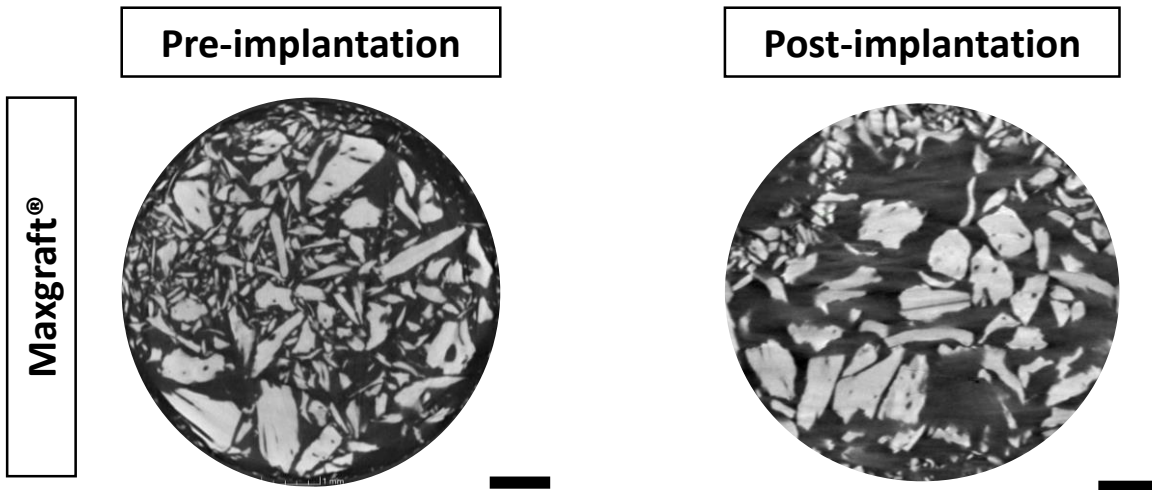

**Figure S1:** Implanted material Maxgraft®. Representative uCT picture of the Maxgraft® granules pre- and post- implantation. (scale bar = 1mm).

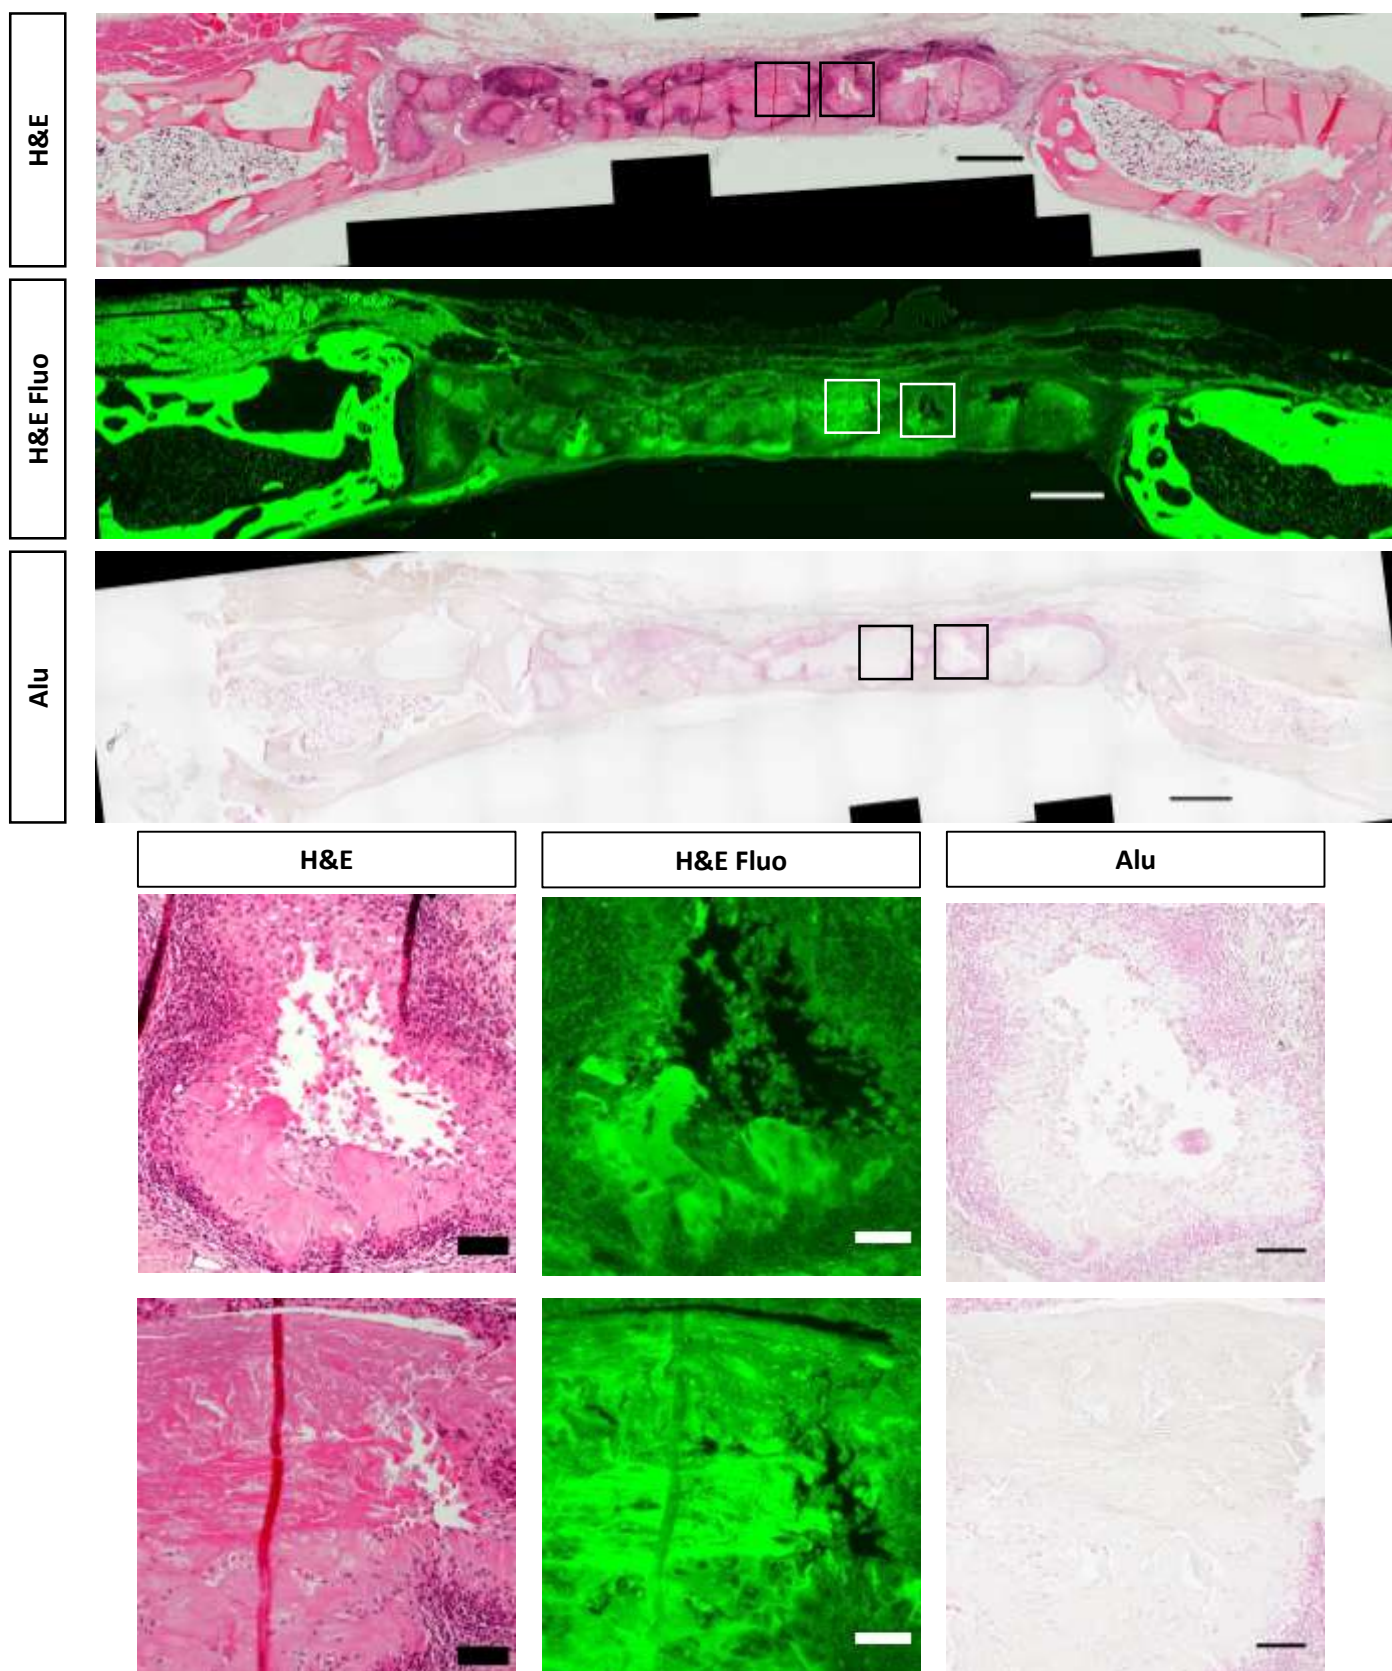

**Figure S2:** Histological analysis of ECM implanted rabbit calvarial defect. H&E stains bone in deep pink and shows the autofluorescence of the collagen from the eosin staining. Alu staining stains positively (purple) by in-situ hybridization for human specific Alu sequences. (scale bar = 1-mm for whole section and 100- $\mu$ m for close up).
